# Supplementary material for: Biological Characterization and Quantification of Rambutan (Nephelium lappaceum L.) Peel Extract as a Potential Source of Valuable Minerals and Ellagitannins for Industrial Applications
Source: PubMed Central journal article supplement — ACS Omega. 2022 Sep 15;7(38):34647–56. doi: 10.1021/acsomega.2c04646 (PMC9521024; doi:10.1021/acsomega.2c04646), 2022-09-15
Supplement: ao2c04646_si_001.pdf [file ao2c04646_si_001.pdf]

**Biological Characterization and Quantification of Rambutan (*Nephelium lappaceum* L.) Peel Extract as a Potential Source of Valuable Minerals and Ellagitannins for Industrial Applications**

**Selorm Torgbo <sup>a</sup>, Prapassorn Rugthaworn <sup>b</sup>, Udomlak Sukatta <sup>b\*</sup>, Prakit Sukyai <sup>a, c</sup>**

<sup>a</sup> Cellulose for Future Materials and Technologies Special Research Unit, Department of Biotechnology, Faculty of Agro-Industry, Kasetsart University, Chatuchak, Bangkok, 10900, Thailand.

<sup>b</sup> Kasetsart Agricultural and Agro-Industrial Product Improvement Institute, Kasetsart University, Chatuchak, Bangkok, 10900, Thailand.

<sup>c</sup> Center for Advanced Studies for Agriculture and Food (CASAF), Kasetsart University Institute for Advanced Studies, Kasetsart University, 50 Ngamwongwan Road Chatuchak, Bangkok, 10900 10900, Thailand.

\* **Corresponding authors:** aapuls@ku.ac.th

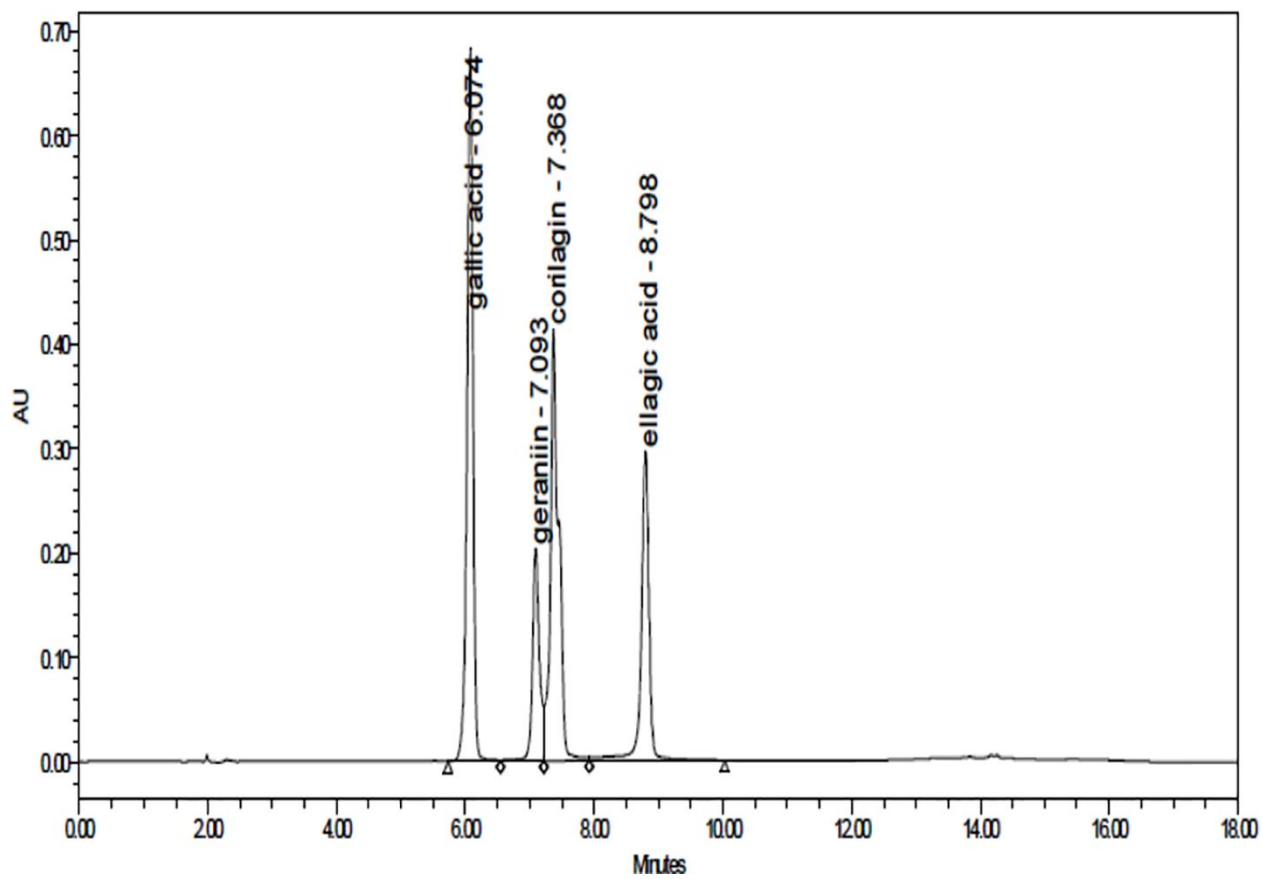

**Figure S1.** HPLC chromatogram of standard calibration curves for quantifying gallic acid, geraniin, corilagin and ellagic acid.

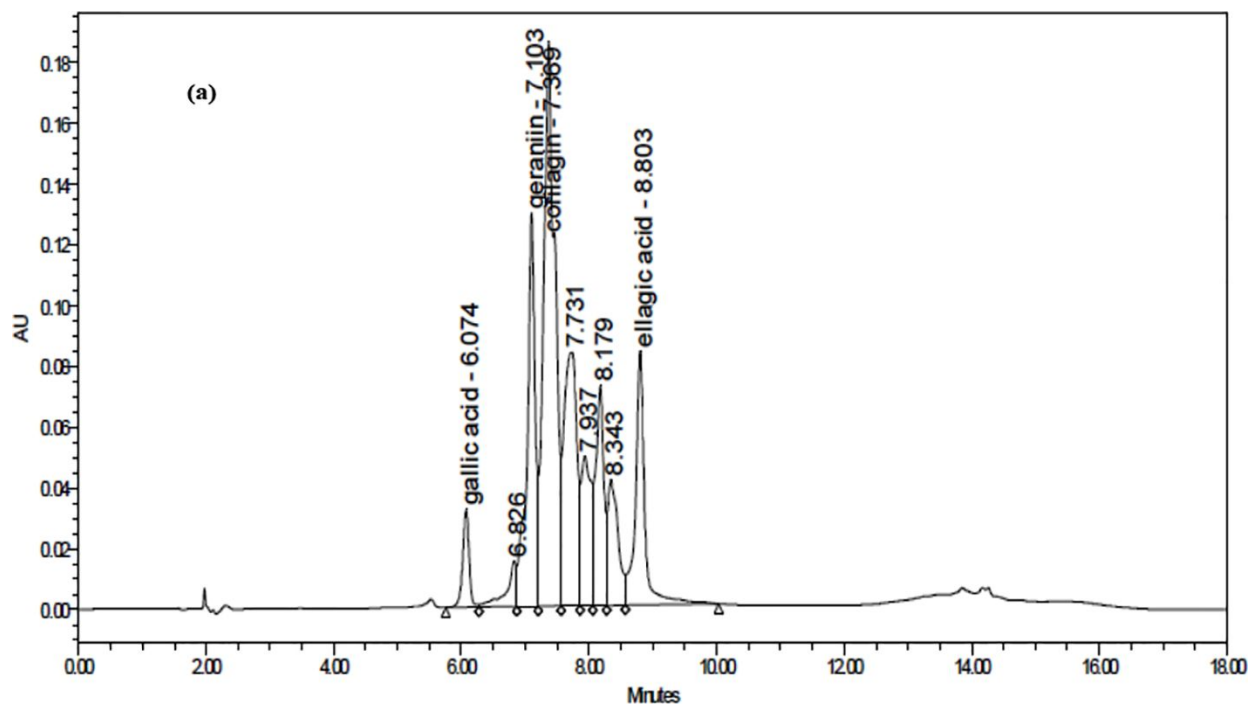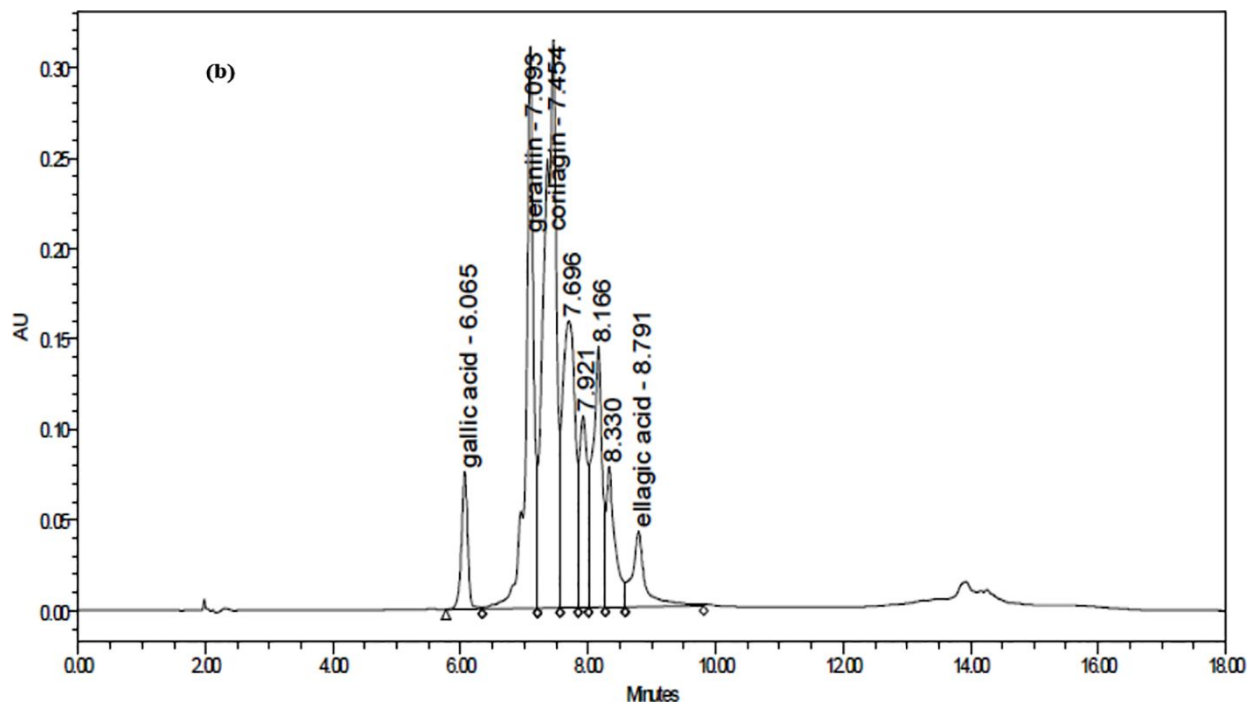

**Figure S2.** HPLC chromatogram of rambutan peel extracts; (a) crude extract and (b) ellagitannin rich extract.

The major ellagitannins and metabolites were separated based on their biological important. It is good to note that there are some other minor compounds present in the peel which are not of interest in this study.

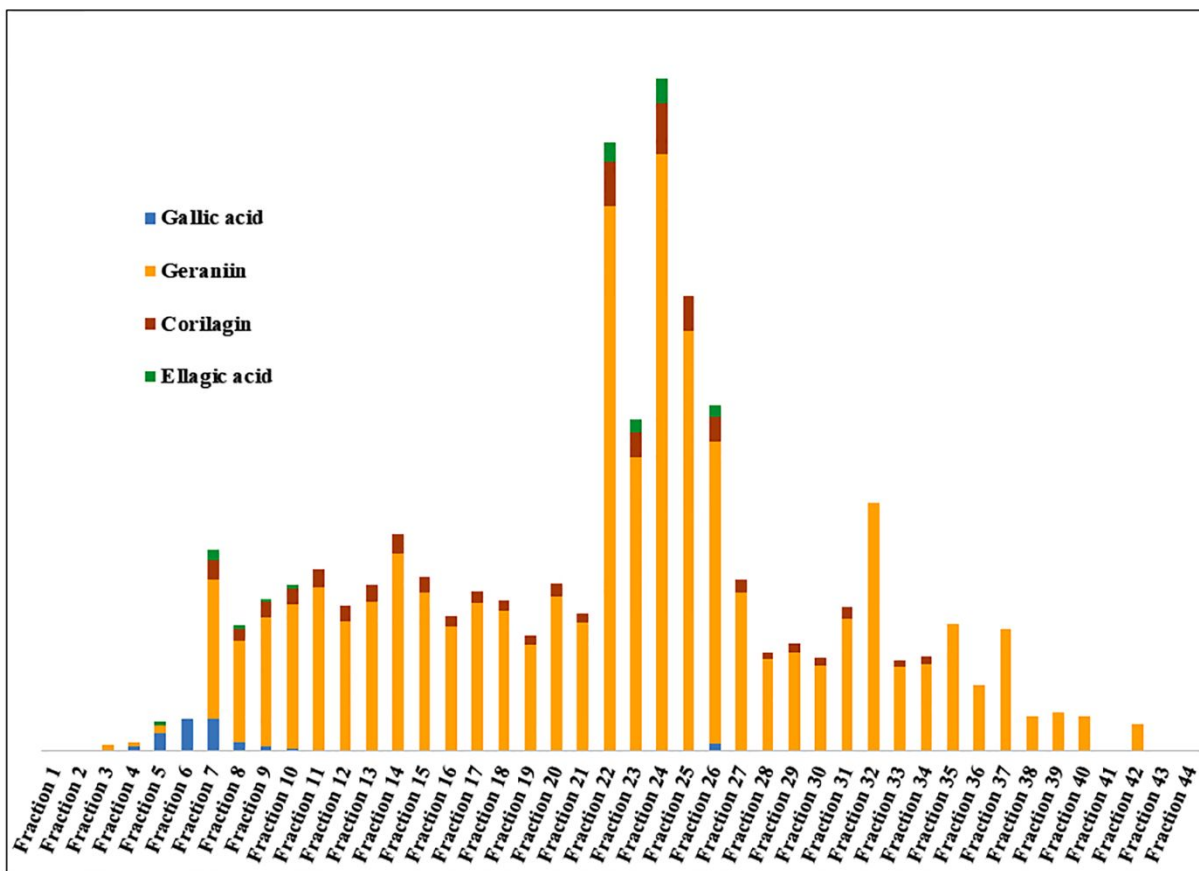

**Figure S3.** Quick column chromatography for fractionation and separation of major ellagitannins in rambutan peel extract.

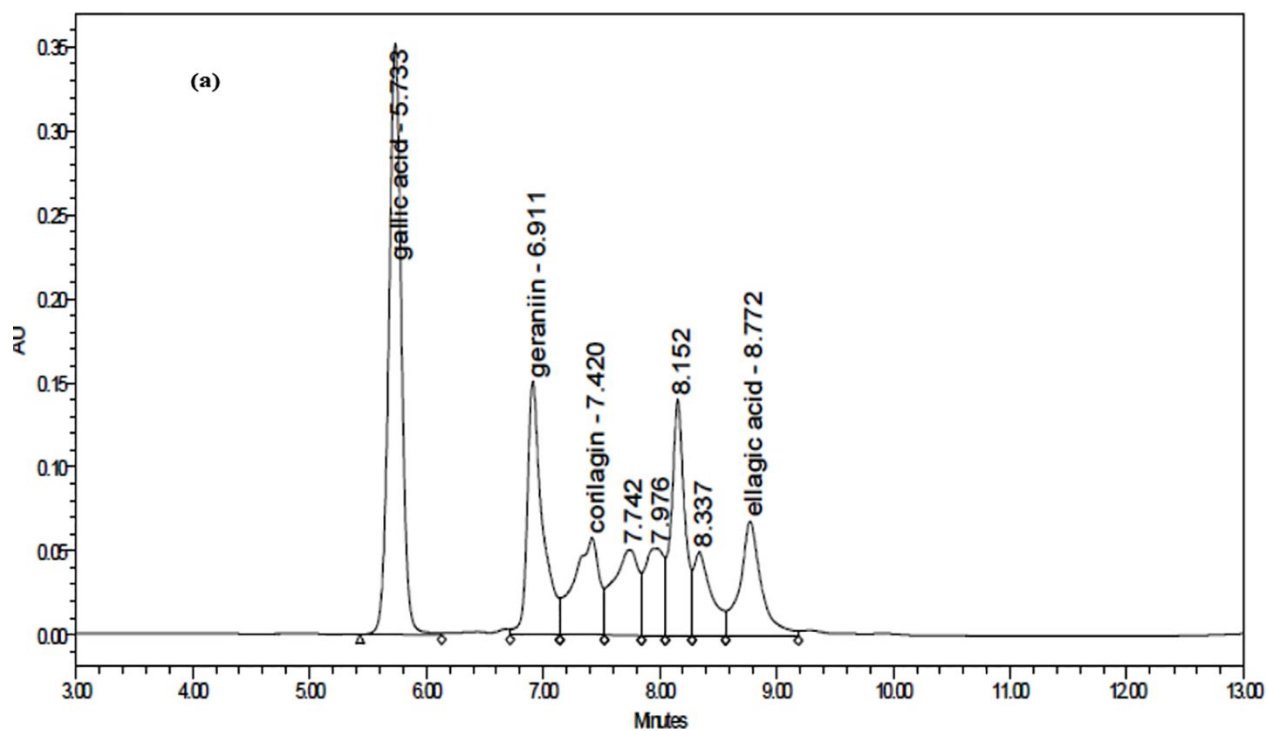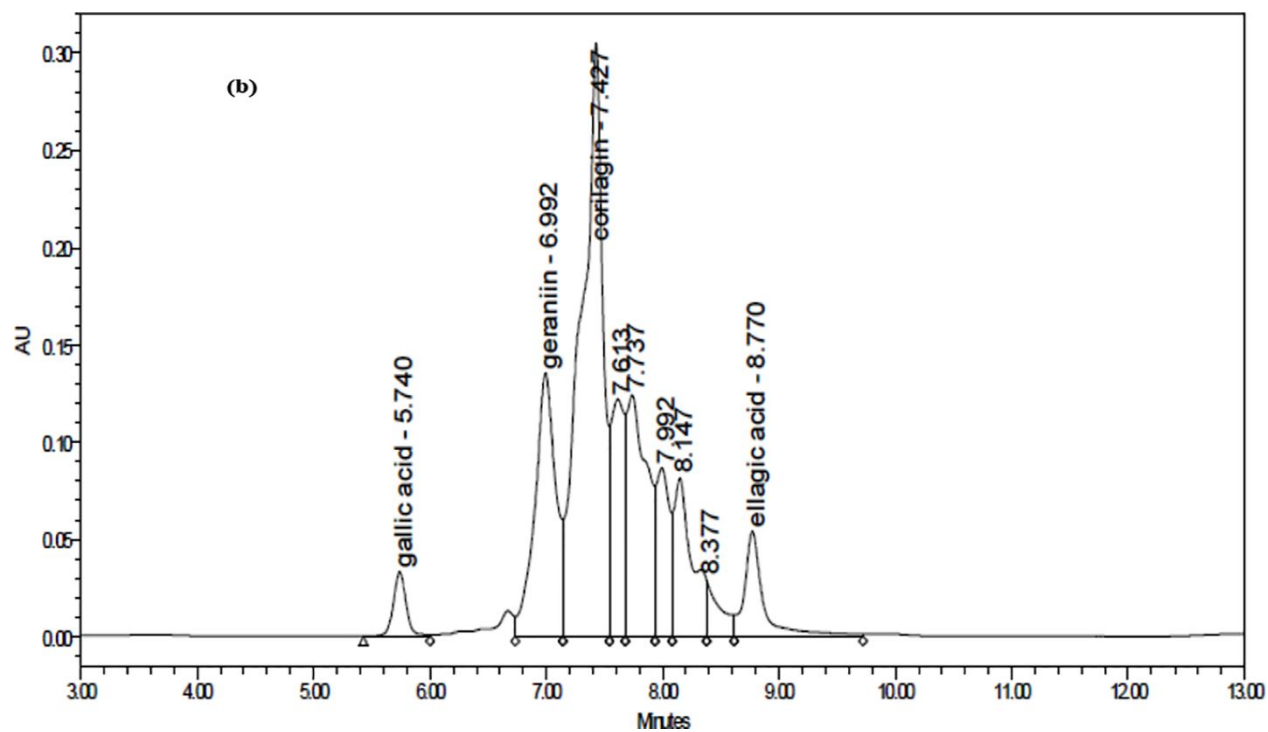

**Figure S4.** HPLC chromatogram of fractionated ellagitannins from rambutan peel extract; geraniin rich (a) fraction 1 and (b) fraction 2.
